# Supplementary material for: Changes in intestinal microbiota in postmenopausal oestrogen receptor-positive breast cancer patients treated with (neo)adjuvant chemotherapy
Source: PubMed Central journal article supplement (PMC9338016; doi:10.1038/s41523-022-00455-5), 2022-07-29
Supplement: 41523_2022_455_MOESM1_ESM.pdf [file 41523_2022_455_MOESM1_ESM.pdf]

# Supplementary Figures

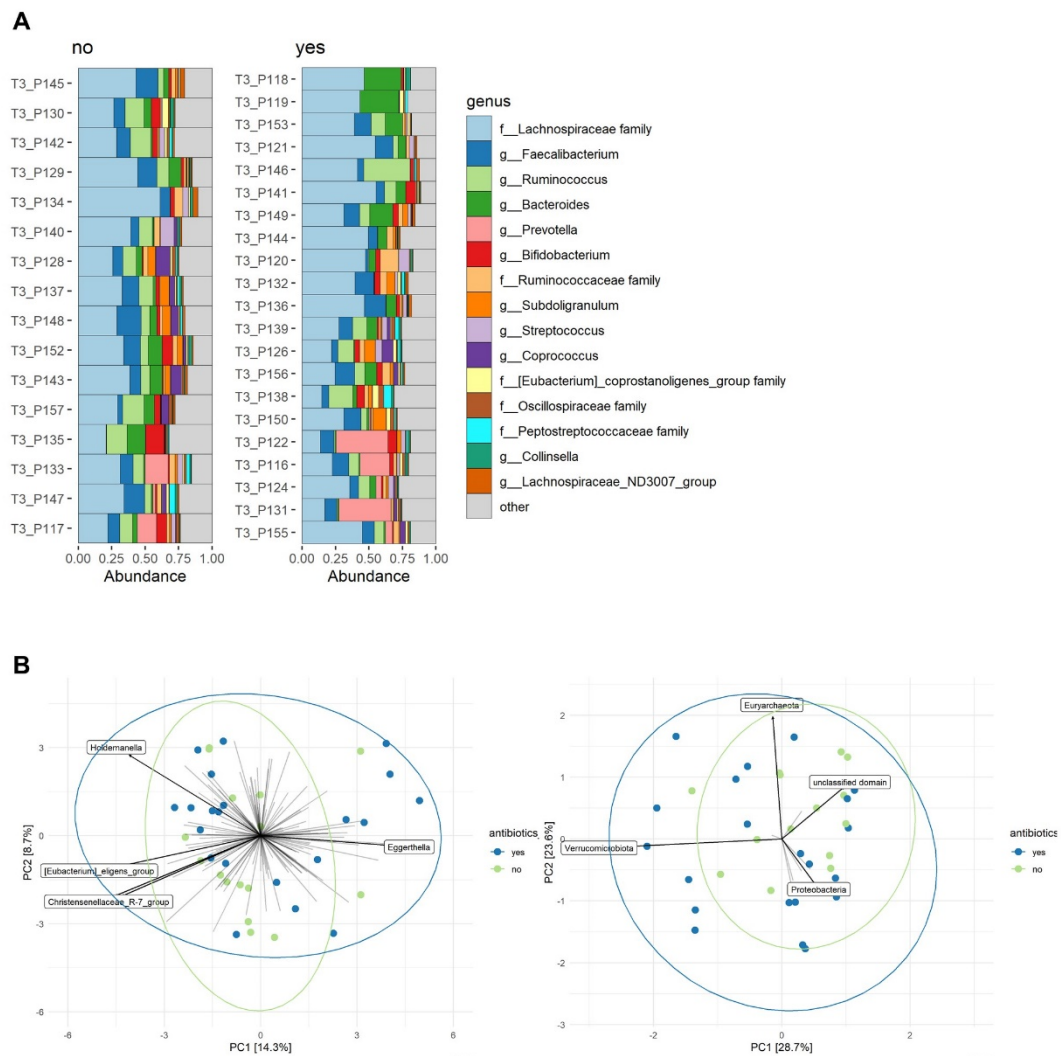

**Supplementary Figure 1: A:** Relative abundance of the 15 most common genera at sampling timepoint T3 among patients without previous antibiotic use (“no”,  $n=16$ ) or with previous antibiotic use before or during AC-D (“yes”,  $n=21$ ). **B:** Ordination plots derived from unconstrained Principal Components Analysis (PCA) based on the Aitchison distance, showing differences in intestinal microbiota composition at T3 between patients with (blue,  $n=21$ ) or without (green,  $n=16$ ) previous antibiotic use before or during AC-D. PERMANOVA showed that there were no statistically significant differences at phylum ( $p=0.280$ ) and genus level ( $p=0.522$ ).

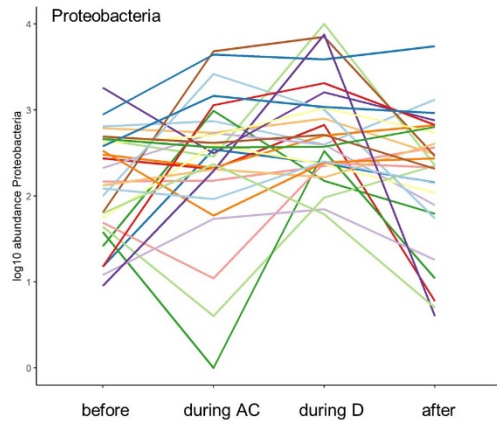

**Supplementary Figure 2:** Longitudinal changes of Proteobacteria abundance in individual patients. Only complete cases ( $n=28$ ) are displayed. Each line represents an individual patient.

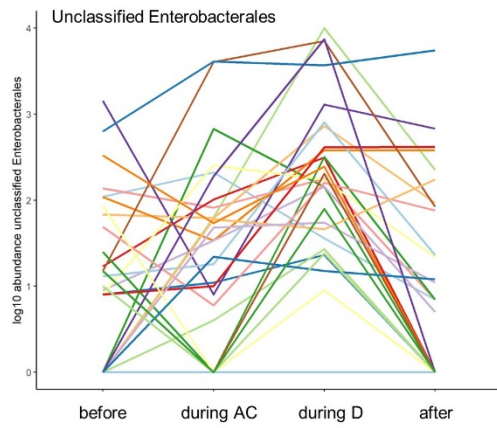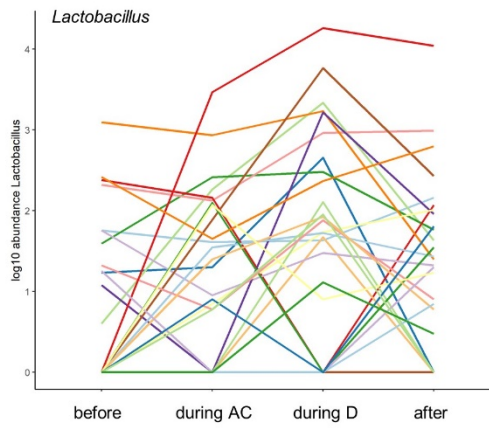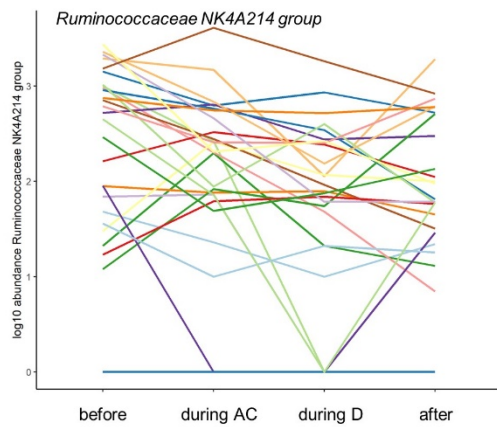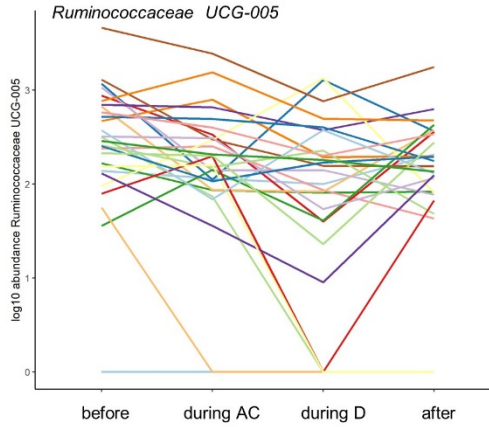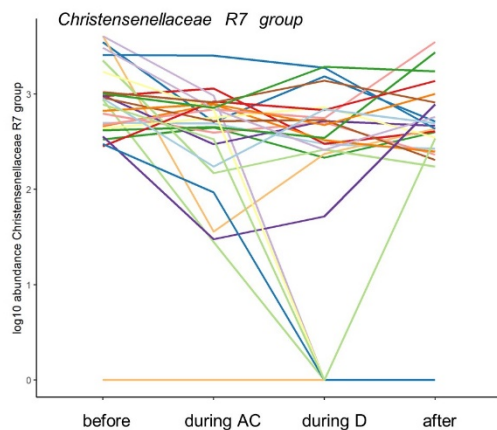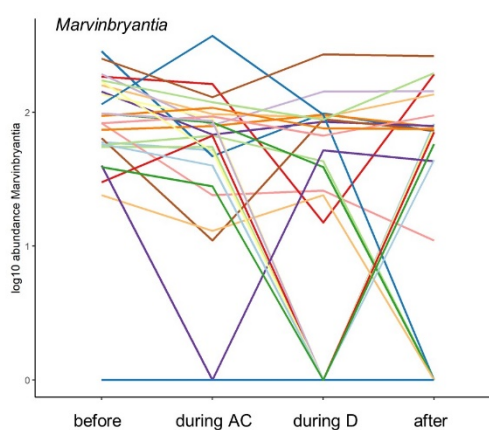

**Supplementary Figure 3:** Longitudinal changes of abundance of different genera in individual patients. Only complete cases ( $n=28$ ) are displayed. Each line represents an individual patient.

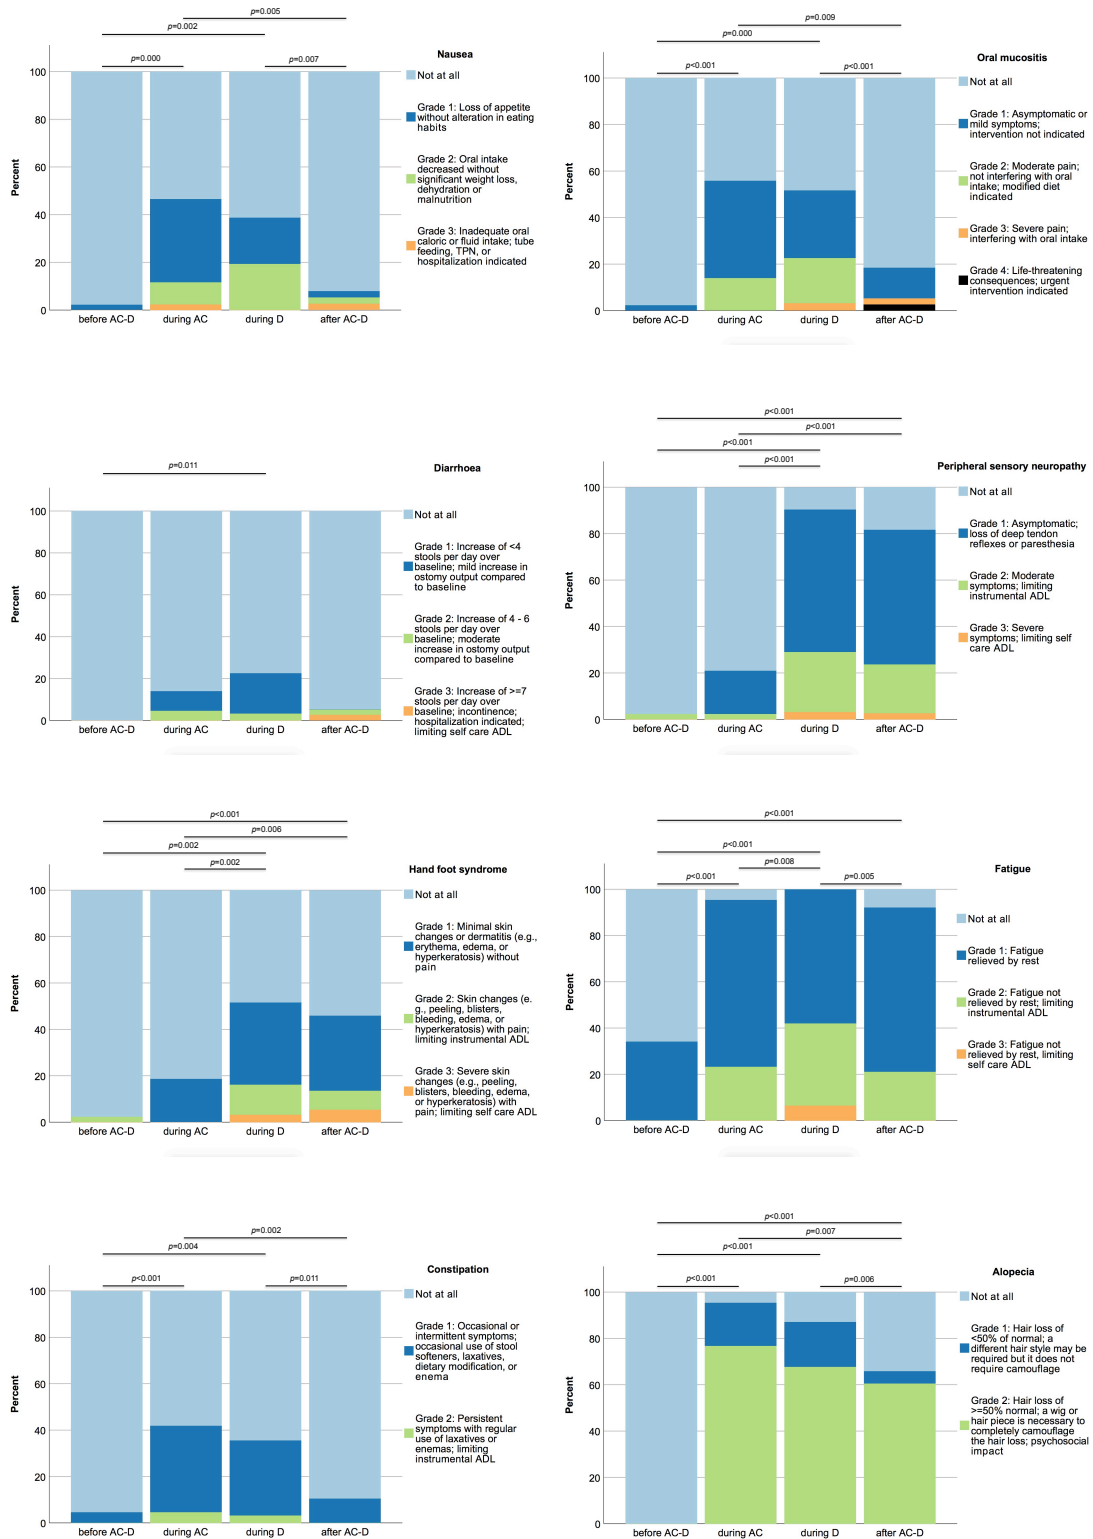

**Supplementary Figure 4:** Stacked bar charts presenting percentage toxicity grades before AC-D, during AC, during D, and after AC-D. Friedman tests indicated that nausea, oral mucositis, diarrhoea, peripheral sensory neuropathy, hand foot syndrome, fatigue, constipation and alopecia changed significantly over time. Presented *p*-values indicate significant differences between the different time points revealed by the Wilcoxon test with Bonferoni correction (See table S11 for numbers of patients per grade classification).

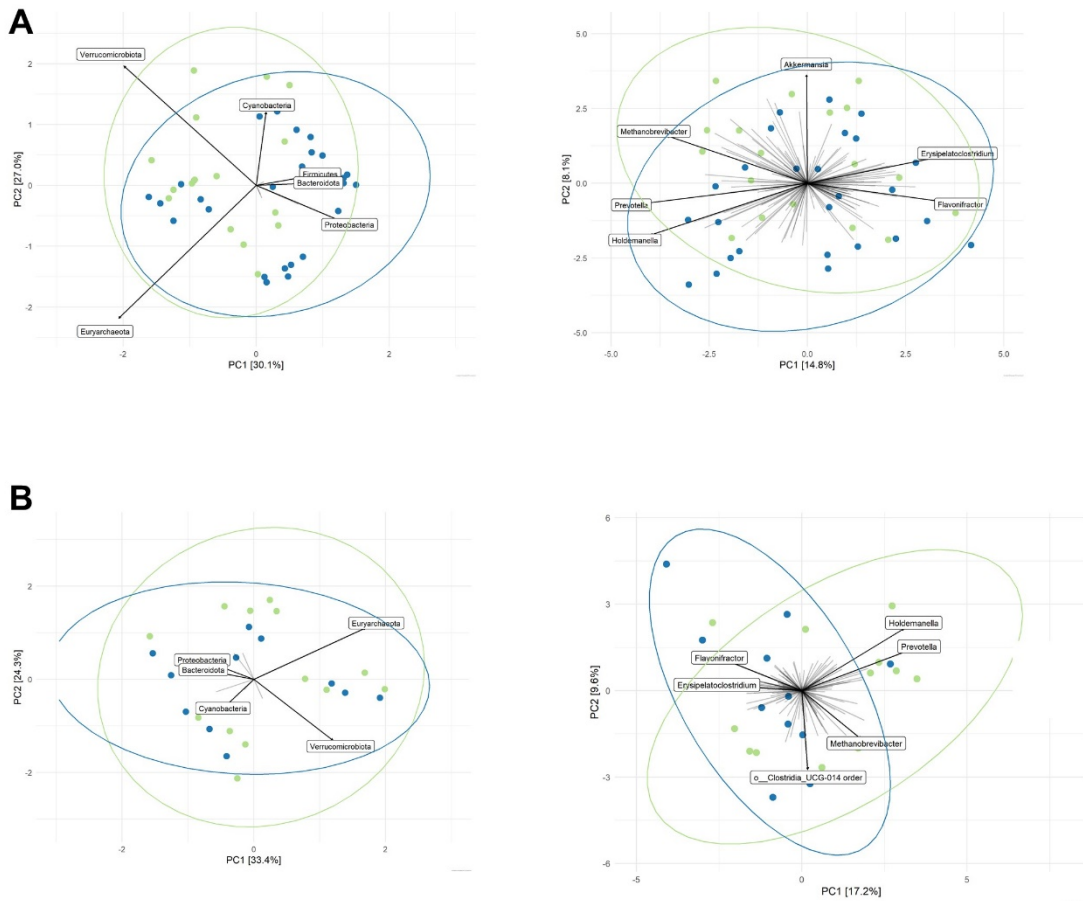

**Supplementary Figure 5: A:** Ordination plots derived from unconstrained Principal Components Analysis (PCA) based on the Aitchison distance, showing differences in baseline (T0) microbiota composition between adjutant (blue,  $n=26$ ) and neo-adjutant patients (green,  $n=18$ ) at phylum and genus level. **B:** Ordination plots derived from unconstrained Principal Components Analysis (PCA) based on the Aitchison distance at phylum and genus level, showing differences in baseline (T0) microbiota composition between adjutant patients who received perioperative prophylactic antibiotics (blue,  $n=12$ ) and adjutant patients who did not receive perioperative prophylactic antibiotics (green,  $n=14$ ). For all plots, taxa that were present in less than 5 samples were excluded for this analysis. Data were transformed using centre-log-ratio transformation. Names are given for taxa, which contributed most to overall microbial variation.

**T0**

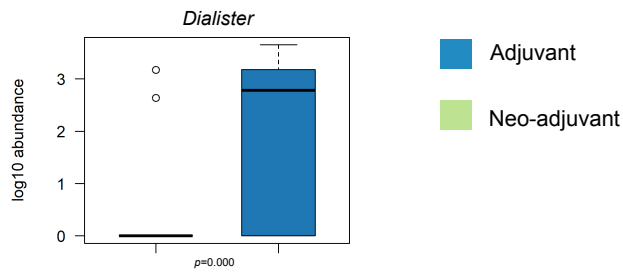

**Supplementary Figure 6:** Baseline log<sub>10</sub> abundance of the genus *Dialister* in adjutant and neo-adjutant patients. ANCOM-II analysis identified this genus to be differentially abundant among adjutant ( $n=26$ ) and neo-adjutant ( $n=18$ ) patients, which was confirmed by a Mann-Whitney-U Test ( $p<0.001$ ).

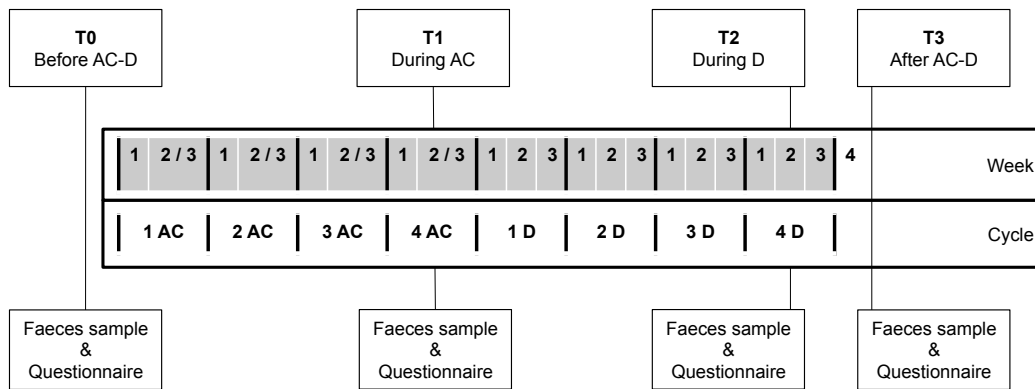

**Supplementary Figure 7:** Study design.

Patients collected a faecal sample and completed a questionnaire at four time points: **T0** was collected before the start of the AC-D, **T1** during week 2 of cycle 4 AC, **T2** during week 2 of cycle 4 D, and **T3** one month after the dose D. During the study period, patients received four cycles adriamycin (A), 60 mg/m<sup>2</sup> i.v. and cyclophosphamide (C) 600 mg/m<sup>2</sup> i.v. on day 1, in either a two-weekly (dose dense, dd) or three-weekly cycle. AC was followed by four cycles of docetaxel (D), 100 mg/m<sup>2</sup> i.v. on day 1, in a three-weekly cycle.

## Supplementary Tables

**Supplementary Table 1:** Clinical characteristics of the total study population at baseline including the comparison between adjuvant and neoadjuvant treated patients.

| Baseline characteristics | Total<br>(n=44) | Adjuvant<br>(n=26) | Neoadjuvant<br>(n=18) | p-value |
|--------------------------|-----------------|--------------------|-----------------------|---------|
| Focality - No. (%)       |                 |                    |                       |         |
| <i>Unifocal tumour</i>   | 33 (75)         | 19 (73)            | 14 (78)               | 0.714   |
| <i>Multifocal tumour</i> | 10 (23)         | 7 (27)             | 3 (17)                |         |
| <i>Unknown</i>           | 1 (2)           | 0 (0)              | 1 (6)                 |         |
| cT stage - No. (%)*      |                 |                    |                       |         |
| 1                        | 20 (46)         | 17 (65)            | 3 (17)                | 0.003   |
| 2                        | 17 (39)         | 7 (27)             | 10 (56)               |         |
| 3                        | 4 (9)           | 2 (8)              | 2 (11)                |         |
| 4                        | 2 (5)           | 0 (0)              | 2 (11)                |         |
| <i>Unknown</i>           | 1 (2)           | 0 (0)              | 1 (6)                 |         |
| cG grade - No. (%)*      |                 |                    |                       |         |
| 1                        | 9 (21)          | 7 (27)             | 2 (11)                | 0.638   |
| 2                        | 22 (50)         | 10 (39)            | 12 (67)               |         |
| 3                        | 9 (21)          | 6 (23)             | 3 (17)                |         |
| <i>Unknown</i>           | 4 (9)           | 3 (12)             | 1 (6)                 |         |
| cN stage - No. (%)*      |                 |                    |                       |         |
| 0                        | 34 (77)         | 23 (89)            | 11 (61)               | 0.016   |
| 1                        | 7 (16)          | 3 (12)             | 4 (22)                |         |
| 2                        | 1 (2)           | 0 (0)              | 1 (6)                 |         |
| 3                        | 2 (5)           | 0 (0)              | 2 (11)                |         |
| cT size - in mm          |                 |                    |                       |         |
| <i>Median (IQR)</i>      | 22 (16)         | 19 (12)            | 28 (16)               | 0.012   |
| (y)pT size -             |                 |                    |                       |         |
| <i>Median (IQR)</i>      | 20 (11)         | 21 (14)            | 15 (13)               | 0.257   |
| 25%-75%                  | 15-26           | 15-29              | 13-25                 |         |
| MIB1%                    |                 |                    |                       |         |
| <i>Median (IQR)</i>      | 15 (25)         | 20 (20)            | 10 (24)               | 0.492   |
| 25%-75%                  | 5-30            | 10-30              | 5-29                  |         |
| Ki-67%                   |                 |                    |                       |         |
| <i>Mean (SD)</i>         | 26 (20)         | 27 (17)            | 25 (25)               | 0.850   |
| <i>Range</i>             | 2-75            | 5-60               | 2-75                  |         |
| OK-type - No (%)         |                 |                    |                       |         |
| <i>Lumpectomy</i>        | 20 (46)         | 12 (46)            | 8 (44)                | 0.954   |
| <i>Mastectomy</i>        | 23 (52)         | 14 (54)            | 9 (50)                |         |

|                                                                |          |          |          |                  |
|----------------------------------------------------------------|----------|----------|----------|------------------|
| <i>Unknown</i>                                                 | 1 (2)    | 0 (0)    | 1 (6)    |                  |
| ER- No (%)                                                     | 0 (0)    | 0 (0)    | 0 (0)    | -                |
| <i>Negative</i>                                                | 44 (100) | 26 (100) | 18 (100) |                  |
| <i>Positive</i>                                                |          |          |          |                  |
| ER %                                                           |          |          |          |                  |
| <i>Median (IQR)</i>                                            | 100 (0)  | 100 (0)  | 100 (5)  | 0.263            |
| 25%-75%                                                        | 100-100  | 100-100  | 95-100   |                  |
| PR- No (%)                                                     | 18 (41)  | 9 (35)   | 9 (50)   | 0.307            |
| <i>Negative</i>                                                | 26 (59)  | 17 (65)  | 9 (50)   |                  |
| <i>Positive</i>                                                |          |          |          |                  |
| PR %                                                           |          |          |          |                  |
| <i>Median (IQR)</i>                                            | 25 (79)  | 30 (75)  | 12 (91)  | 0.745            |
| 25%-75%                                                        | 1-80     | 5-80     | 0-92     |                  |
| DM-type II - No. (%)*                                          |          |          |          |                  |
| <i>No</i>                                                      | 39 (89)  | 23 (89)  | 16 (89)  | 1.000            |
| <i>Yes</i>                                                     | 5 (11)   | 3 (12)   | 2 (11)   |                  |
| Prior systemic treatment - No. (%)                             |          |          |          |                  |
| <i>No</i>                                                      | 44 (100) | 26 (100) | 18 (100) | -                |
| <i>Yes</i>                                                     | 0 (0)    | 0 (0)    | 0 (0)    |                  |
| Days therapeutic antibiotic use last year                      |          |          |          |                  |
| <i>Median (IQR)</i>                                            | 7 (4)    | 6 (3)    | 9 (-)    | 0.286            |
| 25-75%                                                         | 5-9      | 5-8      | 7- -     |                  |
| Days from operation                                            |          |          |          |                  |
| <i>Mean (SD)</i>                                               | 50 (23)  | 50 (23)  | -        | -                |
| <i>Range</i>                                                   | 18-93    | 18-93    |          |                  |
| Prophylactic antibiotic use during operation - No. (%)         |          |          |          |                  |
| <i>No</i>                                                      | 14 (54)  | 14 (54)  | 18 (100) | <b>&lt;0.001</b> |
| <i>Yes</i>                                                     | 12 (46)  | 12 (46)  | 0 (0)    |                  |
| Oral contraception use - years                                 |          |          |          |                  |
| <i>Median (IQR)</i>                                            | 12 (13)  | 10 (15)  | 15 (19)  | 0.104            |
| 25%-75%                                                        | 8-21     | 5-20     | 10-29    |                  |
| Years between T0 faecal sample and last oral contraception use |          |          |          |                  |
| <i>Mean (SD)</i>                                               | 20 (13)  | 22 (14)  | 17 (12)  | 0.274            |
| <i>Range</i>                                                   | 0.1-49.3 | 0.2-49   | 0.1-39   |                  |
| Years between T0 faecal sample and last hormone IUD use        |          |          |          |                  |
| <i>Mean (SD)</i>                                               | 7 (5)    | 5 (5)    | 9 (5)    | 0.229            |
| <i>Range</i>                                                   | 1-15     | 1-12     | 5-15     |                  |

\*Percentages do not add up to 100% due to rounding.

| <b>Supplementary Table 2:</b> Longitudinal clinical characteristics of the total study population |                          |                        |                       |                         |                  |                                                                                                                                                           |
|---------------------------------------------------------------------------------------------------|--------------------------|------------------------|-----------------------|-------------------------|------------------|-----------------------------------------------------------------------------------------------------------------------------------------------------------|
| <b>Clinical characteristics</b>                                                                   | <b>T0</b><br>before AC-D | <b>T1</b><br>during AC | <b>T2</b><br>during D | <b>T3</b><br>after AC-D | <b>p-value</b>   | <b>Pairwise comparison</b>                                                                                                                                |
| Karnofsky Performance Score - No (%) <sup>*</sup>                                                 |                          |                        |                       |                         |                  |                                                                                                                                                           |
| 20-30                                                                                             | 0 (0)                    | 0 (0)                  | 1 (3)                 | 0 (0)                   | <b>&lt;0.001</b> | <b>T0 vs T1 &lt; 0.001</b><br><b>T0 vs T2 &lt; 0.001</b><br><b>T0 vs T3 &lt; 0.001</b><br>T1 vs T2 = 0.051<br>T1 vs T3 = 0.531<br><b>T2 vs T3 = 0.005</b> |
| 40-50                                                                                             | 0 (0)                    | 0 (0)                  | 2 (6)                 | 1 (3)                   |                  |                                                                                                                                                           |
| 60-70                                                                                             | 3 (7)                    | 9 (22)                 | 13 (40)               | 11 (29)                 |                  |                                                                                                                                                           |
| 80-90                                                                                             | 22 (50)                  | 31 (74)                | 11 (41)               | 23 (61)                 |                  |                                                                                                                                                           |
| 100                                                                                               | 19 (43)                  | 2 (5)                  | 3 (9)                 | 3 (8)                   |                  |                                                                                                                                                           |
| MUST-score - No (%)                                                                               |                          |                        |                       |                         |                  |                                                                                                                                                           |
| Low risk                                                                                          | 38 (86)                  | 34 (79)                | 22 (67)               | 32 (84)                 | <b>0.023</b>     | T0 vs T1 = 0.117<br>T0 vs T2 = 0.022<br>T0 vs T3 = 0.739<br><b>T1 vs T2 &lt; 0.001</b><br>T1 vs T3 = 0.531<br><b>T2 vs T3 = 0.005</b>                     |
| Medium risk                                                                                       | 6 (14)                   | 5 (12)                 | 6 (18)                | 6 (16)                  |                  |                                                                                                                                                           |
| High risk                                                                                         | 0 (0)                    | 4 (9)                  | 5 (15)                | 0 (0)                   |                  |                                                                                                                                                           |
|                                                                                                   |                          |                        |                       |                         |                  |                                                                                                                                                           |
| BMI - kg/m <sup>2</sup>                                                                           |                          |                        |                       |                         |                  |                                                                                                                                                           |
| Median (IQR)                                                                                      | 26 (5)                   | 26 (5)                 | 27 (5)                | 26 (4)                  | 0.338            | T0 vs T1 = 0.024<br>T0 vs T2 = 0.265<br>T0 vs T3 = 0.777<br>T1 vs T2 = 0.470<br>T1 vs T3 = 0.330<br>T2 vs T3 = 0.048                                      |
| 25%-75%                                                                                           | 24-29                    | 23-28                  | 24-28                 | 24-28                   |                  |                                                                                                                                                           |

\*Percentages do not add up to 100% due to rounding.

MUST: Malnutrition Universal Screening Tool.

Wilcoxon signed-rank sum test with Bonferroni correction was used for pairwise comparison. After Bonferroni correction p-values below 0.0125 indicated significance.



**Supplementary Table 3:** Longitudinal clinical data - therapeutic and prophylactic antibiotic use during the course of AC-D treatment of the total study population including the comparison between adjuvant and neoadjuvant treated patients.

| Antibiotic use          | Total   | Adjuvant | Neoadjuvant | p-value |
|-------------------------|---------|----------|-------------|---------|
| Between T0-T1           |         |          |             |         |
| Antibiotic use - No (%) |         |          |             | 0.060   |
| No                      | 33 (79) | 17 (68)  | 16 (94)     |         |
| Yes                     | 9 (21)  | 8 (32)   | 1 (6)       |         |
| Between T1-T2           |         |          |             |         |
| Antibiotic use - No (%) |         |          |             | 1.000   |
| No                      | 18 (62) | 10 (63)  | 8 (62)      |         |
| Yes                     | 11 (38) | 6 (38)   | 5 (39)      |         |
| Between T2-T3           |         |          |             |         |
| Antibiotic use - No (%) |         |          |             | 1.000   |
| No                      | 35 (95) | 20 (95)  | 15 (94)     |         |
| Yes                     | 2 (5)   | 1 (5)    | 1 (6)       |         |

**Supplementary Table 4:** Therapy adjustments of the total study population during the course of AC-D

| <b>Therapy adjustments</b>                | <b>T1</b><br>during AC | <b>T2</b><br>during D | <b>T3</b><br>overall |
|-------------------------------------------|------------------------|-----------------------|----------------------|
| Therapy adjustments overall - No (%)      |                        |                       |                      |
| <i>No</i>                                 | 37 (86)                | 18 (42)               | 14 (33)              |
| <i>Yes</i>                                | 6 (14)                 | 25 (58)               | 29 (67)              |
| Type therapy adjustments overall - No (%) |                        |                       |                      |
| <i>Stop</i>                               | 0 (0)                  | 16 (37)               | 12 (28)              |
| <i>Reduction, delay, and/or switch</i>    | 6 (14)                 | 9 (21)                | 17 (39)              |
| % dose received overall                   |                        |                       |                      |
| <i>Median (IQR)</i>                       | 100 (0)                | 88 (25)               | 94 (13)              |
| <i>25%-75%</i>                            | 100-100                | 75-100                | 88-100               |

N=43 since one patient did not start with AC-D.

During AC, only one patient received 95% of the planned doses.

| <b>Supplementary Table 5:</b> Longitudinal $\alpha$ -diversity measures of participants who provided all four samples ( $n=28$ ) |                          |                        |                       |                         |                                       |
|----------------------------------------------------------------------------------------------------------------------------------|--------------------------|------------------------|-----------------------|-------------------------|---------------------------------------|
| <b><math>\alpha</math>-diversity measures</b>                                                                                    | <b>T0</b><br>before AC-D | <b>T1</b><br>during AC | <b>T2</b><br>during D | <b>T3</b><br>after AC-D | <b>ANOVA</b><br><b><i>p</i>-value</b> |
| Observed richness                                                                                                                |                          |                        |                       |                         |                                       |
| <i>Mean (SD)</i>                                                                                                                 | 240 (48)                 | 229 (40)               | 218 (57)              | 217 (47)                | $p=0.042$                             |
| <i>Range</i>                                                                                                                     | 136-330                  | 157-308                | 84-310                | 87-304                  |                                       |
| Shannon                                                                                                                          |                          |                        |                       |                         |                                       |
| <i>Mean (SD)</i>                                                                                                                 | 4.0 (0.3)                | 3.9 (0.3)              | 3.9 (0.3)             | 3.9 (0.3)               | $p=0.206$                             |
| <i>Range</i>                                                                                                                     | 3.3-4.6                  | 3.4-4.5                | 3.1-4.4               | 3.1-4.5                 |                                       |

Changes in  $\alpha$ -diversity measures of the 28 participants who provided all four samples before AC-D, during AC, during D, and after AC-D treatment, measured in terms of observed species richness ( $p=0.042$ ;  $n=28$ ) and Shannon index ( $p=0.206$ ;  $n=28$ ). Repeated measure ANOVA was performed to test differences in  $\alpha$ -diversity measures over time.

**Supplementary Table 6:** Longitudinal  $\alpha$ -diversity measures of all samples of the total population

| <b><math>\alpha</math>-diversity measures</b>       | <b>T0</b><br>before AC-D<br>(n=44) | <b>T1</b><br>during AC<br>(n=43) | <b>T2</b><br>during D<br>(n=29) | <b>T3</b><br>after AC-D<br>(n=37) | <b>Pairwise comparison</b>                                                                                                  |
|-----------------------------------------------------|------------------------------------|----------------------------------|---------------------------------|-----------------------------------|-----------------------------------------------------------------------------------------------------------------------------|
| Observed richness<br><i>Median (IQR)</i><br>25%-75% | 247 (61)<br>203-264                | 230 (75)<br>181-256              | 232 (78)<br>178-255             | 221 (64)<br>185-249               | T0 vs T1 = 0.038<br>T0 vs T2 = 0.029<br><b>T0 vs T3 = 0.003</b><br>T1 vs T2 = 0.284<br>T1 vs T3 = 0.088<br>T2 vs T3 = 0.657 |
| Shannon index<br><i>Median (IQR)</i><br>25%-75%     | 4.03 (0.4)<br>3.8-4.2              | 3.92 (0.5)<br>3.7-4.2            | 3.90 (0.5)<br>3.7-4.2           | 3.99 (0.5)<br>3.7-4.1             | T0 vs T1 = 0.137<br>T0 vs T2 = 0.090<br>T0 vs T3 = 0.099<br>T1 vs T2 = 0.611<br>T1 vs T3 = 0.429<br>T2 vs T3 = 0.569        |

Wilcoxon signed-rank sum test with Bonferroni correction was used for pairwise comparison. After Bonferroni correction  $p$ -values below 0.0125 indicated significance.

| <b>Supplementary Table 7A: <math>\alpha</math>-diversity measures in patients with or without therapeutic antibiotics 1 year prior to T0</b> |                         |                                 |                                 |                |
|----------------------------------------------------------------------------------------------------------------------------------------------|-------------------------|---------------------------------|---------------------------------|----------------|
| <b><math>\alpha</math>-diversity measures</b>                                                                                                | <b>Total<br/>(n=44)</b> | <b>- Antibiotics<br/>(n=32)</b> | <b>+ Antibiotics<br/>(n=12)</b> | <b>p-value</b> |
| T0 Observed richness                                                                                                                         |                         |                                 |                                 |                |
| Mean (SD)                                                                                                                                    | 234 (45)                | 230 (48)                        | 244 (39)                        | 0.388          |
| Range                                                                                                                                        | 135-330                 | 135-330                         | 166-301                         |                |
| T1 Observed richness                                                                                                                         |                         |                                 |                                 |                |
| Mean (SD)                                                                                                                                    | 222 (47)                | 221 (46)                        | 225 (52)                        | 0.802          |
| Range                                                                                                                                        | 107-308                 | 121-293                         | 107-308                         |                |
| T2 Observed richness                                                                                                                         |                         |                                 |                                 |                |
| Mean (SD)                                                                                                                                    | 217 (57)                | 216 (48)                        | 222 (78)                        | 0.789          |
| Range                                                                                                                                        | 84-310                  | 134-294                         | 84-310                          |                |
| T3 Observed richness                                                                                                                         |                         |                                 |                                 |                |
| Mean (SD)                                                                                                                                    | 213 (48)                | 215 (41)                        | 206 (66)                        | 0.606          |
| Range                                                                                                                                        | 87-304                  | 104-280                         | 87-304                          |                |
| T0 Shannon index                                                                                                                             |                         |                                 |                                 |                |
| Mean (SD)                                                                                                                                    | 4.0 (0.3)               | 4.0 (0.36)                      | 4.0 (0.29)                      | 0.856          |
| Range                                                                                                                                        | 3.0-4.6                 | 3.0-4.6                         | 3.6-4.5                         |                |
| T1 Shannon index                                                                                                                             |                         |                                 |                                 |                |
| Mean (SD)                                                                                                                                    | 3.9 (0.4)               | 3.9 (0.35)                      | 3.9 (0.43)                      | 0.996          |
| Range                                                                                                                                        | 2.8-4.5                 | 2.8-4.5                         | 2.8-4.5                         |                |
| T2 Shannon index                                                                                                                             |                         |                                 |                                 |                |
| Mean (SD)                                                                                                                                    | 3.9 (0.3)               | 3.9 (0.27)                      | 4.0 (0.45)                      | 0.413          |
| Range                                                                                                                                        | 3.1-4.4                 | 3.3-4.4                         | 3.1-4.4                         |                |
| T3 Shannon index                                                                                                                             |                         |                                 |                                 |                |
| Median (IQR)                                                                                                                                 | 4.0 (0.5)               | 4.0 (0.36)                      | 4.0 (0.66)                      | 0.671          |
| 25-75%                                                                                                                                       | 3.7-4.1                 | 3.8-4.1                         | 3.5-4.1                         |                |

| <b>Supplementary Table 7B: alpha diversity measures with or without prophylactic antibiotics during OK all of the adjuvant treated patients</b> |                         |                                 |                                 |                |
|-------------------------------------------------------------------------------------------------------------------------------------------------|-------------------------|---------------------------------|---------------------------------|----------------|
| <b>α-diversity measures</b>                                                                                                                     | <b>Total<br/>(n=26)</b> | <b>- Antibiotics<br/>(n=14)</b> | <b>+ Antibiotics<br/>(n=12)</b> | <b>p-value</b> |
| T0 Observed richness                                                                                                                            |                         |                                 |                                 |                |
| Median (IQR)                                                                                                                                    | 248 (62)                | 239 (61)                        | 249 (71)                        | 0.667          |
| 25-75%                                                                                                                                          | 205-267                 | 204-264                         | 186-258                         |                |
| T0 Shannon index                                                                                                                                |                         |                                 |                                 |                |
| Mean (SD)                                                                                                                                       | 4.0 (0.25)              | 4.0 (0.29)                      | 3.8 (0.29)                      | 0.155          |
| Range                                                                                                                                           | 3.5-4.5                 | 3.9-4.2                         | 3.7-4.0                         |                |

| <b>Supplementary Table 8: correlation between antibiotic administration during AC-D treatment and <math>\alpha</math>-diversity</b> |                                               |              |                                                |         |                                              |         |
|-------------------------------------------------------------------------------------------------------------------------------------|-----------------------------------------------|--------------|------------------------------------------------|---------|----------------------------------------------|---------|
| <b><math>\alpha</math>-diversity measures</b>                                                                                       | <b>antibiotics during T0-T1</b><br>(n=9, 21%) |              | <b>antibiotics during T1-T2</b><br>(n=11, 38%) |         | <b>antibiotics during T2-T3</b><br>(n=2, 5%) |         |
|                                                                                                                                     | Correlation coefficient                       | p-value      | Correlation coefficient                        | p-value | Correlation coefficient                      | p-value |
| T1 Observed species richness                                                                                                        | -0.457                                        | <b>0.002</b> | NA                                             | NA      | NA                                           | NA      |
| T2 Observed species richness                                                                                                        | -0.296                                        | 0.126        | -0.221                                         | 0.250   | NA                                           | NA      |
| T3 Observed species richness                                                                                                        | -0.091                                        | 0.597        | -0.092                                         | 0.640   | -0.078                                       | 0.645   |
| T1 Shannon index                                                                                                                    | -0.452                                        | <b>0.003</b> | NA                                             | NA      | NA                                           | NA      |
| T2 Shannon index                                                                                                                    | -0.312                                        | 0.105        | -0.195                                         | 0.310   | NA                                           | NA      |
| T3 Shannon index                                                                                                                    | -0.233                                        | 0.171        | -0.018                                         | 0.926   | <0.001                                       | 1.000   |

Spearman's rho ( $r_s$ ) correlation coefficient was used to assess the relation between antibiotic administration and  $\alpha$ -diversity measures  
NA: not applicable

| <b>Supplementary Table 9: correlation between cumulative antibiotic administration and <math>\alpha</math>-diversity</b> |                                                       |                 |                                                       |                 |                                                       |                 |
|--------------------------------------------------------------------------------------------------------------------------|-------------------------------------------------------|-----------------|-------------------------------------------------------|-----------------|-------------------------------------------------------|-----------------|
| <b><math>\alpha</math>-diversity measures</b>                                                                            | <b>Cumulative antibiotics until T1</b><br>(n=17, 40%) |                 | <b>Cumulative antibiotics until T2</b><br>(n=17, 59%) |                 | <b>Cumulative antibiotics until T3</b><br>(n=21, 57%) |                 |
|                                                                                                                          | Correlation coefficient                               | <i>p</i> -value | Correlation coefficient                               | <i>p</i> -value | Correlation coefficient                               | <i>p</i> -value |
| T1 Observed species richness                                                                                             | -0.178                                                | 0.253           | NA                                                    | NA              | NA                                                    | NA              |
| T2 Observed species richness                                                                                             | -0.084                                                | 0.666           | -0.088                                                | 0.650           | NA                                                    | NA              |
| T3 Observed species richness                                                                                             | -0.026                                                | 0.878           | -0.089                                                | 0.651           | -0.158                                                | 0.349           |
| T1 Shannon index                                                                                                         | -0.241                                                | 0.119           | NA                                                    | NA              | NA                                                    | NA              |
| T2 Shannon index                                                                                                         | -0.025                                                | 0.897           | -0.075                                                | 0.698           | NA                                                    | NA              |
| T3 Shannon index                                                                                                         | -0.198                                                | 0.239           | -0.080                                                | 0.684           | -0.225                                                | 0.181           |

Spearman's rho ( $r_s$ ) correlation coefficient was used to assess the relation between cumulative antibiotic administration and  $\alpha$ -diversity measures.

NA: not applicable

Cumulative antibiotic use was defined as: cumulative therapeutic and prophylactic antibiotic use from the year prior to baseline faecal sample collection until the index sample



**Supplementary Table 10:** Longitudinal differential abundant taxa of the total study population

| Taxa                                                                   | T0<br>before AC-D<br>(n=44) | T1<br>during AC<br>(n=43) | T2<br>during D<br>(n=29) | T3<br>after AC-D<br>(n=37) | p-value          | Pairwise<br>comparison                                                                                                                              |
|------------------------------------------------------------------------|-----------------------------|---------------------------|--------------------------|----------------------------|------------------|-----------------------------------------------------------------------------------------------------------------------------------------------------|
| Proteobacteria<br><i>Median (IQR)</i><br>25%-75%                       | 2.12 (0.94)<br>1.70-2.63    | 2.54 (0.69)<br>2.18-2.87  | 2.60 (0.67)<br>2.36-3.03 | 2.36 (0.98)<br>1.84-2.82   | <b>0.006</b>     | T0 vs T1 = 0.023<br><b>T0 vs T2 &lt; 0.001</b><br>T0 vs T3 = 0.074<br>T1 vs T2 = 0.043<br>T1 vs T3 = 0.667<br><b>T2 vs T3 = 0.003</b>               |
| unclassified Enterobacteriales<br><i>Median (IQR)</i><br>25%-75%       | 1.15 (1.91)<br>0.00-1.91    | 1.36 (2.28)<br>0.00-2.28  | 2.24 (1.24)<br>1.49-2.74 | 0.85 (1.95)<br>0.00-1.95   | <b>&lt;0.001</b> | T0 vs T1 = 0.122<br><b>T0 vs T2 &lt; 0.001</b><br>T0 vs T3 = 0.877<br><b>T1 vs T2 &lt; 0.001</b><br>T1 vs T3 = 0.117<br><b>T2 vs T3 &lt; 0.001</b>  |
| <i>Lactobacillus</i><br><i>Median (IQR)</i><br>25%-75%                 | 0.00 (1.39)<br>0.00-1.39    | 0.95 (2.10)<br>0.00-2.10  | 1.72 (2.57)<br>0.00-2.57 | 1.40 (2.04)<br>0.00-2.04   | <b>0.004</b>     | <b>T0 vs T1 = 0.006</b><br><b>T0 vs T2 = 0.002</b><br><b>T0 vs T3 = 0.001</b><br>T1 vs T2 = 0.024<br>T1 vs T3 = 0.245<br>T2 vs T3 = 0.174           |
| <i>Ruminococcaceae NK4A214 group</i><br><i>Median (IQR)</i><br>25%-75% | 2.48 (1.25)<br>1.72-2.97    | 2.41 (0.97)<br>1.79-2.76  | 1.88 (1.91)<br>0.50-2.41 | 1.85 (1.36)<br>1.30-2.66   | <b>&lt;0.001</b> | T0 vs T1 = 0.132<br><b>T0 vs T2 = 0.001</b><br><b>T0 vs T3 &lt; 0.001</b><br><b>T1 vs T2 = 0.005</b><br><b>T1 vs T3 = 0.011</b><br>T2 vs T3 = 0.927 |
| <i>Intestinibacter</i><br><i>Median (IQR)</i><br>25%-75%               | 2.00 (1.44)<br>1.21-2.65    | 1.54 (2.47)<br>0.00-2.47  | 2.23 (1.90)<br>1.17-3.07 | 2.46 (1.26)<br>1.65-2.90   | 0.347            | T0 vs T1 = 0.013<br>T0 vs T2 = 0.200<br>T0 vs T3 = 0.219<br>T1 vs T2 = 0.041<br><b>T1 vs T3 = 0.002</b><br>T2 vs T3 = 0.716                         |
| <i>Marvinbryantia</i><br><i>Median (IQR)</i><br>25%-75%                | 1.92 (0.56)<br>1.59-2.15    | 1.83 (0.91)<br>1.11-2.02  | 1.41 (1.95)<br>0.00-1.95 | 1.76 (1.91)<br>0.00-1.91   | <b>0.020</b>     | <b>T0 vs T1 = 0.003</b><br><b>T0 vs T2 &lt; 0.001</b><br><b>T0 vs T3 = 0.003</b><br>T1 vs T2 = 0.041<br>T1 vs T3 = 0.140<br>T2 vs T3 = 0.685        |
| <i>Christensenellaceae R7 group</i><br><i>Median (IQR)</i><br>25%-75%  | 2.83 (0.60)<br>2.57-3.17    | 2.72 (0.74)<br>2.17-2.91  | 2.48 (1.93)<br>0.86-2.79 | 2.61 (1.24)<br>1.71-2.95   | <b>0.008</b>     | T0 vs T1 = 0.013<br><b>T0 vs T2 = 0.001</b><br><b>T0 vs T3 = 0.004</b><br>T1 vs T2 = 0.387<br>T1 vs T3 = 0.489<br>T2 vs T3 = 0.548                  |
| <i>Ruminococcaceae UCG-005</i><br><i>Median (IQR)</i>                  | 2.41 (0.73)                 | 2.30 (0.73)               | 2.00 (1.31)              | 2.12 (0.65)                | <b>&lt;0.001</b> | <b>T0 vs T1 = 0.007</b><br><b>T0 vs T2 &lt; 0.001</b><br><b>T0 vs T3 &lt; 0.001</b>                                                                 |

|                                                |                          |                          |                          |                          |       |                                                                                                                      |
|------------------------------------------------|--------------------------|--------------------------|--------------------------|--------------------------|-------|----------------------------------------------------------------------------------------------------------------------|
| 25%-75%                                        | 2.09-2.81                | 1.87-2.60                | 1.16-2.47                | 1.90-2.54                |       | <b>T1 vs T2 = 0.012</b><br>T1 vs T3 = 0.105<br>T2 vs T3 = 0.317                                                      |
| <i>Turicibacter</i><br>Median (IQR)<br>25%-75% | 1.42 (2.27)<br>0.00-2.27 | 0.95 (1.79)<br>0.00-1.79 | 1.89 (1.68)<br>0.85-2.52 | 1.45 (2.26)<br>0.00-2.26 | 0.069 | T0 vs T1 = 0.098<br>T0 vs T2 = 0.062<br>T0 vs T3 = 0.962<br>T1 vs T2 = 0.015<br>T1 vs T3 = 0.066<br>T2 vs T3 = 0.067 |

Friedman's ANOVA was used to test for changes in abundance over time.

Wilcoxon signed-rank sum test with Bonferroni correction was used for pairwise comparison. After Bonferroni correction *p*-values below 0.0125 indicated significance.

**Supplementary Table 11:** Longitudinal CTCAE in grade of the total study population

| Toxicity grade                         | T0<br>before AC-D | T1<br>during AC | T2<br>during D | T3<br>after AC-D | p-value          | Pairwise comparison                                                                                                                                          |
|----------------------------------------|-------------------|-----------------|----------------|------------------|------------------|--------------------------------------------------------------------------------------------------------------------------------------------------------------|
| Nausea - No. (%)*                      |                   |                 |                |                  |                  |                                                                                                                                                              |
| 0                                      | 43 (98)           | 23 (54)         | 19 (61)        | 35 (92)          | <b>&lt;0.001</b> | <b>T0 vs T1 &lt; 0.001</b><br><b>T0 vs T2 = 0.002</b><br>T0 vs T3 = 0.197<br>T1 vs T2 = 1.000<br><b>T1 vs T3 = 0.005</b><br><b>T2 vs T3 = 0.007</b>          |
| 1                                      | 1 (2)             | 15 (35)         | 6 (19)         | 1 (3)            |                  |                                                                                                                                                              |
| 2                                      | 0 (0)             | 4 (9)           | 6 (19)         | 1 (3)            |                  |                                                                                                                                                              |
| 3                                      | 0 (0)             | 1 (2)           | 0 (0)          | 1 (3)            |                  |                                                                                                                                                              |
| Vomiting - No (%)                      |                   |                 |                |                  |                  |                                                                                                                                                              |
| 0                                      | 44 (100)          | 42 (98)         | 30 (97)        | 37 (97)          | 0.392            | T0 vs T1 = 0.317<br>T0 vs T2 = 0.317<br>T0 vs T3 = 0.317<br>T1 vs T2 = 1.000<br>T1 vs T3 = 1.000<br>T2 vs T3 = 1.000                                         |
| 1                                      | 0 (0)             | 1 (2)           | 1 (3)          | 1 (3)            |                  |                                                                                                                                                              |
| Oral mucositis - No (%)*               |                   |                 |                |                  |                  |                                                                                                                                                              |
| 0                                      | 43 (98)           | 19 (44)         | 15 (48)        | 31 (82)          | <b>&lt;0.001</b> | <b>T0 vs T1 &lt; 0.001</b><br><b>T0 vs T2 &lt; 0.001</b><br>T0 vs T3 = 0.024<br>T1 vs T2 = 0.227<br><b>T1 vs T3 = 0.009</b><br><b>T2 vs T3 &lt; 0.001</b>    |
| 1                                      | 1 (2)             | 18 (42)         | 9 (29)         | 5 (13)           |                  |                                                                                                                                                              |
| 2                                      | 0 (0)             | 6 (14)          | 6 (19)         | 0 (0)            |                  |                                                                                                                                                              |
| 3                                      | 0 (0)             | 0 (0)           | 1 (3)          | 1 (3)            |                  |                                                                                                                                                              |
| 4                                      | 0 (0)             | 0 (0)           | 0 (0)          | 1 (3)            |                  |                                                                                                                                                              |
| Diarrhoea - No (%)*                    |                   |                 |                |                  |                  |                                                                                                                                                              |
| 0                                      | 44 (100)          | 37 (86)         | 24 (77)        | 36 (95)          | <b>0.005</b>     | T0 vs T1 = 0.023<br><b>T0 vs T2 = 0.011</b><br>T0 vs T3 = 0.180<br>T1 vs T2 = 0.527<br>T1 vs T3 = 0.666<br>T2 vs T3 = 0.014                                  |
| 1                                      | 0 (0)             | 4 (9)           | 6 (19)         | 0 (0)            |                  |                                                                                                                                                              |
| 2                                      | 0 (0)             | 2 (5)           | 1 (3)          | 1 (3)            |                  |                                                                                                                                                              |
| 3                                      | 0 (0)             | 0 (0)           | 0 (0)          | 1 (3)            |                  |                                                                                                                                                              |
| Constipation - No. (%)*                |                   |                 |                |                  |                  |                                                                                                                                                              |
| 0                                      | 42 (96)           | 25 (58)         | 20 (65)        | 34 (90)          | <b>&lt;0.001</b> | <b>T0 vs T1 &lt; 0.001</b><br><b>T0 vs T2 = 0.004</b><br>T0 vs T3 = 0.157<br>T1 vs T2 = 0.197<br><b>T1 vs T3 = 0.002</b><br><b>T2 vs T3 = 0.011</b>          |
| 1                                      | 2 (5)             | 16 (37)         | 10 (32)        | 4 (11)           |                  |                                                                                                                                                              |
| 2                                      | 0 (0)             | 2 (5)           | 1 (3)          | 0 (0)            |                  |                                                                                                                                                              |
| Fever - No (%)*                        |                   |                 |                |                  |                  |                                                                                                                                                              |
| 0                                      | 44 (100)          | 40 (93)         | 27 (87)        | 36 (95)          | 0.072            | T0 vs T1 = 0.102<br>T0 vs T2 = 0.063<br>T0 vs T3 = 0.157<br>T1 vs T2 = 1.000<br>T1 vs T3 = 0.414<br>T2 vs T3 = 0.102                                         |
| 1                                      | 0 (0)             | 2 (5)           | 2 (7)          | 2 (5)            |                  |                                                                                                                                                              |
| 2                                      | 0 (0)             | 0 (0)           | 2 (7)          | 0 (0)            |                  |                                                                                                                                                              |
| 3                                      | 0 (0)             | 0 (0)           | 0 (0)          | 0 (0)            |                  |                                                                                                                                                              |
| 4                                      | 0 (0)             | 1 (2)           | 0 (0)          | 0 (0)            |                  |                                                                                                                                                              |
| Peripheral sensory neuropathy - No (%) |                   |                 |                |                  |                  |                                                                                                                                                              |
| 0                                      | 43 (98)           | 34 (79)         | 3 (10)         | 7 (18)           | <b>&lt;0.001</b> | T0 vs T1 = 0.021<br><b>T0 vs T2 &lt; 0.001</b><br><b>T0 vs T3 &lt; 0.001</b><br><b>T1 vs T2 &lt; 0.001</b><br><b>T1 vs T3 &lt; 0.001</b><br>T2 vs T3 = 0.132 |
| 1                                      | 0 (0)             | 8 (19)          | 19 (61)        | 22 (58)          |                  |                                                                                                                                                              |
| 2                                      | 1 (2)             | 1 (2)           | 8 (26)         | 8 (21)           |                  |                                                                                                                                                              |
| 3                                      | 0 (0)             | 0 (0)           | 1 (3)          | 1 (3)            |                  |                                                                                                                                                              |
| Hand foot syndrome - No. (%)*          |                   |                 |                |                  |                  |                                                                                                                                                              |
| 0                                      | 43 (98)           | 35 (81)         | 15 (48)        | 20 (54)          | <b>&lt;0.001</b> | T0 vs T1 = 0.083<br><b>T0 vs T2 = 0.002</b>                                                                                                                  |

|                    |          |         |         |         |                  |                            |
|--------------------|----------|---------|---------|---------|------------------|----------------------------|
| 1                  | 0 (0)    | 8 (19)  | 11 (36) | 12 (32) |                  | <b>T0 vs T3 &lt; 0.001</b> |
| 2                  | 1 (2)    | 0 (0)   | 4 (13)  | 3 (8)   |                  | <b>T1 vs T2 = 0.002</b>    |
| 3                  | 0 (0)    | 0 (0)   | 1 (3)   | 2 (5)   |                  | <b>T1 vs T3 = 0.006</b>    |
|                    |          |         |         |         |                  | T2 vs T3 = 0.323           |
| Fatigue - No (%)*  |          |         |         |         |                  | <b>T0 vs T1 &lt; 0.001</b> |
| 0                  | 29 (66)  | 2 (5)   | 0 (0)   | 3 (8)   | <b>&lt;0.001</b> | <b>T0 vs T2 &lt; 0.001</b> |
| 1                  | 15 (34)  | 31 (72) | 18 (58) | 27 (71) |                  | <b>T0 vs T3 &lt; 0.001</b> |
| 2                  | 0 (0)    | 10 (23) | 11 (36) | 8 (21)  |                  | <b>T1 vs T2 = 0.008</b>    |
| 3                  | 0 (0)    | 0 (0)   | 2 (7)   | 0 (0)   |                  | T1 vs T3 = 0.593           |
|                    |          |         |         |         |                  | <b>T2 vs T3 = 0.005</b>    |
| Alopecia - No (%)* |          |         |         |         |                  | <b>T0 vs T1 &lt; 0.001</b> |
| 0                  | 44 (100) | 2 (5)   | 4 (13)  | 13 (34) | <b>&lt;0.001</b> | <b>T0 vs T2 &lt; 0.001</b> |
| 1                  | 0 (0)    | 8 (19)  | 6 (19)  | 2 (5)   |                  | <b>T0 vs T3 &lt; 0.001</b> |
| 2                  | 0 (0)    | 33 (77) | 21 (68) | 23 (61) |                  | T1 vs T2 = 0.163           |
|                    |          |         |         |         |                  | <b>T1 vs T3 = 0.007</b>    |
|                    |          |         |         |         |                  | <b>T2 vs T3 = 0.006</b>    |

\*Percentages do not add up to 100% due to rounding.

Friedman's ANOVA was used to indicate differences in chemotherapy toxicity during the course of AC-D

Wilcoxon signed-rank sum test with Bonferroni correction was used for pairwise comparison. After Bonferroni correction *p*-values below 0.0125 indicated significance.

**Supplementary Table 12:** Longitudinal clinical characteristics of the total study population (N=44) - bone marrow toxicity

| Bone marrow toxicity                                         | T0<br>before AC-D<br>(n=44) | T1<br>during AC<br>(n=43) | T2<br>during D<br>(n=29) | T3<br>after AC-D<br>(n=37) | p-value          | Pairwise<br>comparison                                                                                               |
|--------------------------------------------------------------|-----------------------------|---------------------------|--------------------------|----------------------------|------------------|----------------------------------------------------------------------------------------------------------------------|
| Haemoglobin - in $\mu\text{L}$<br>Median (IQR)<br>25%-75%    | 8.4 (0.7)<br>8.1-8.8        | 7.3 (0.9)<br>6.7-7.6      | 7.1 (0.7)<br>6.7-7.4     | 6.9 (0.7)<br>6.7-7.4       | <b>&lt;0.001</b> | T0 vs T1 < 0.001<br>T0 vs T2 < 0.001<br>T0 vs T3 < 0.001<br>T1 vs T2 = 0.030<br>T1 vs T3 = 0.464<br>T2 vs T3 = 0.374 |
| Thrombocytes - in $10^9/\text{l}$<br>Median (IQR)<br>25%-75% | 272 (92)<br>255-347         | 323 (158)<br>250-405      | 331 (108)<br>259-367     | 317 (132)<br>260-392       | <b>0.012</b>     | T0 vs T1 = 0.111<br>T0 vs T2 = 0.280<br>T0 vs T3 = 0.465<br>T1 vs T2 = 0.308<br>T1 vs T3 = 0.082<br>T2 vs T3 = 0.030 |
| Leucocytes - in $10^9/\text{l}$<br>Median (IQR)<br>25%-75%   | 7.2 (3.1)<br>5.9-9.0        | 6.9 (7.4)<br>4.6-12       | 7.9 (6.2)<br>5.3-11.5    | 6.8 (3.6)<br>5.2-8.8       | 0.151            | T0 vs T1 = 0.621<br>T0 vs T2 = 0.256<br>T0 vs T3 = 0.455<br>T1 vs T2 = 0.993<br>T1 vs T3 = 0.092<br>T2 vs T3 = 0.041 |
| Neutrophils - $10^9/\text{l}$<br>Median (IQR)<br>25%-75%     | 4.6 (2.5)<br>3.3-5.8        | 4.6 (7.4)<br>2.9-10.3     | 6.0 (6.6)<br>3.5-10.1    | 4.3 (2.0)<br>3.4-5.4       | 0.190            | T0 vs T1 = 0.350<br>T0 vs T2 = 0.104<br>T0 vs T3 = 0.600<br>T1 vs T2 = 0.801<br>T1 vs T3 = 0.056<br>T2 vs T3 = 0.016 |

Friedman's ANOVA was used to indicate differences in bone marrow toxicity during the course of AC-D

Wilcoxon signed-rank sum test with Bonferroni correction was used for pairwise comparison. After Bonferroni correction p-values below 0.0125 indicated significance.

| <b>Supplementary Table 13: <math>\beta</math>-diversity and chemotherapy toxicity of the total study population</b> |                                           |                                  |                                          |                                  |
|---------------------------------------------------------------------------------------------------------------------|-------------------------------------------|----------------------------------|------------------------------------------|----------------------------------|
|                                                                                                                     | <b>T1</b><br>during AC<br>( <i>n</i> =43) |                                  | <b>T2</b><br>during D<br>( <i>n</i> =29) |                                  |
| <b>Any grade CTCAE</b>                                                                                              | <b>Genus</b><br><i>p</i> -value           | <b>Phylum</b><br><i>p</i> -value | <b>Genus</b><br><i>p</i> -value          | <b>Phylum</b><br><i>p</i> -value |
| Diarrhoea                                                                                                           | 0.4656                                    | 0.6536                           | 0.1584                                   | 0.3597                           |
| Nausea                                                                                                              | 0.9138                                    | 0.6290                           | 0.6312                                   | 0.2483                           |
| Oral mucositis                                                                                                      | 0.4268                                    | 0.6718                           | 0.8789                                   | 0.4593                           |
| Hand foot syndrome                                                                                                  | 0.8237                                    | 0.9645                           | 0.8926                                   | 0.3600                           |
| Peripheral sensory neuropathy                                                                                       | 0.8630                                    | 0.9962                           | 0.6169                                   | 0.4959                           |

PERMANOVA showed that microbial community structures on both phylum and genus level during AC and during D were not associated with toxicity.

**Supplementary Table 14:** Longitudinal clinical characteristics of neoadjuvant treated patients

| Clinical characteristics              | T0<br>before AC-D | T1<br>during AC | T2<br>during D | T3<br>after AC-D | p-value          | Pairwise<br>comparison                                                           |
|---------------------------------------|-------------------|-----------------|----------------|------------------|------------------|----------------------------------------------------------------------------------|
| Karnofsky Performance Score - No (%)* |                   |                 |                |                  |                  | <b>T0 vs T1 &lt; 0.001</b><br><b>T0 vs T2 = 0.001</b><br><b>T0 vs T3 = 0.001</b> |
| 40-50                                 | 0 (0)             | 0 (0)           | 1 (7)          | 0 (0)            | <b>&lt;0.001</b> | T1 vs T2 = 0.031                                                                 |
| 60-70                                 | 0 (0)             | 3 (18)          | 6 (43)         | 4 (25)           |                  | T1 vs T3 = 0.480                                                                 |
| 80-90                                 | 5 (28)            | 13 (77)         | 6 (43)         | 12 (76)          |                  | <b>T2 vs T3 = 0.013</b>                                                          |
| 100                                   | 13 (72)           | 1 (6)           | 1 (7)          | 0 (0)            |                  |                                                                                  |
| MUST-score - No (%)*                  |                   |                 |                |                  |                  | T0 vs T1 = 0.157                                                                 |
| Low risk                              | 16 (89)           | 14 (78)         | 11 (73)        | 12 (75)          | 0.294            | T0 vs T2 = 0.129                                                                 |
| Medium risk                           | 2 (11)            | 2 (11)          | 2 (13)         | 4 (25)           |                  | T0 vs T3 = 0.180                                                                 |
| High risk                             | 0 (0)             | 2 (11)          | 2 (13)         | 0 (0)            |                  | T1 vs T2 = 0.450                                                                 |
|                                       |                   |                 |                |                  |                  | T1 vs T3 = 1.000                                                                 |
|                                       |                   |                 |                |                  |                  | T2 vs T3 = 0.083                                                                 |
| BMI - kg/m <sup>2</sup>               |                   |                 |                |                  |                  | T0 vs T1 = 0.494                                                                 |
| Median (IQR)                          | 26 (7)            | 27 (7)          | 27 (6)         | 27 (5)           | 0.332            | T0 vs T2 = 0.865                                                                 |
| 25%-75%                               | 24-31             | 23-30           | 24-29          | 24-29            |                  | T0 vs T3 = 0.755                                                                 |
|                                       |                   |                 |                |                  |                  | T1 vs T2 = 0.753                                                                 |
|                                       |                   |                 |                |                  |                  | T1 vs T3 = 0.348                                                                 |
|                                       |                   |                 |                |                  |                  | T2 vs T3 = 0.154                                                                 |

\* Percentages do not add up to 100% due to rounding

Wilcoxon signed-rank sum test with Bonferroni correction was used for pairwise comparison. After Bonferroni correction p-values below 0.0125 indicated significance.

**Supplementary Table 15:** Longitudinal CTCAE in grade of neo-adjuvant treated patients

| Toxicity grade                          | T0<br>before AC-D | T1<br>during AC | T2<br>during D | T3<br>after AC-D | p-value          | Pairwise comparison     |
|-----------------------------------------|-------------------|-----------------|----------------|------------------|------------------|-------------------------|
| Nausea - No. (%)                        |                   |                 |                |                  |                  |                         |
| 0                                       | 18 (100)          | 13 (72)         | 7 (50)         | 16 (100)         | <b>0.001</b>     | T0 vs T1 = 0.025        |
| 1                                       | 0 (0)             | 5 (28)          | 5 (36)         | 0 (0)            |                  | T0 vs T2 = 0.014        |
| 2                                       | 0 (0)             | 0 (0)           | 2 (14)         | 0 (0)            |                  | T0 vs T3 = 1.000        |
| 3                                       | 0 (0)             | 0 (0)           | 0 (0)          | 0 (0)            |                  | T1 vs T2 = 0.096        |
|                                         |                   |                 |                |                  |                  | T1 vs T3 = 0.046        |
|                                         |                   |                 |                |                  |                  | T2 vs T3 = 0.014        |
| Vomiting - No (%)                       |                   |                 |                |                  |                  |                         |
| 0                                       | 18 (100)          | 18 (100)        | 14 (100)       | 16 (100)         | -                | -                       |
| 1                                       | 0 (0)             | 0 (0)           | 0 (0)          | 0 (0)            |                  |                         |
| Oral mucositis - No (%)*                |                   |                 |                |                  |                  |                         |
| 0                                       | 18 (100)          | 8 (44)          | 7 (50)         | 14 (88)          | <b>0.002</b>     | <b>T0 vs T1 = 0.003</b> |
| 1                                       | 0 (0)             | 8 (44)          | 4 (29)         | 2 (13)           |                  | T0 vs T2 = 0.015        |
| 2                                       | 0 (0)             | 2 (11)          | 3 (21)         | 0 (0)            |                  | T0 vs T3 = 0.157        |
| 3                                       | 0 (0)             | 0 (0)           | 0 (0)          | 0 (0)            |                  | T1 vs T2 = 0.603        |
| 4                                       | 0 (0)             | 0 (0)           | 0 (0)          | 0 (0)            |                  | T1 vs T3 = 0.035        |
|                                         |                   |                 |                |                  |                  | T2 vs T3 = 0.014        |
| Diarrhoea - No (%)*                     |                   |                 |                |                  |                  |                         |
| 0                                       | 18 (100)          | 16 (89)         | 10 (71)        | 16 (100)         | <b>0.019</b>     | T0 vs T1 = 0.180        |
| 1                                       | 0 (0)             | 1 (6)           | 4 (29)         | 0 (0)            |                  | T0 vs T2 = 0.046        |
| 2                                       | 0 (0)             | 1 (6)           | 0 (0)          | 0 (0)            |                  | T0 vs T3 = 1.000        |
| 3                                       | 0 (0)             | 0 (0)           | 0 (0)          | 0 (0)            |                  | T1 vs T2 = 0.083        |
|                                         |                   |                 |                |                  |                  | T1 vs T3 = 0.317        |
|                                         |                   |                 |                |                  |                  | T2 vs T3 = 0.046        |
| Constipation - No. (%)                  |                   |                 |                |                  |                  |                         |
| 0                                       | 18 (100)          | 11 (61)         | 10 (71)        | 16 (100)         | <b>0.019</b>     | <b>T0 vs T1 = 0.008</b> |
| 1                                       | 0 (0)             | 7 (39)          | 4 (29)         | 0 (0)            |                  | T0 vs T2 = 0.046        |
| 2                                       | 0 (0)             | 0 (0)           | 0 (0)          | 0 (0)            |                  | T0 vs T3 = 1.000        |
|                                         |                   |                 |                |                  |                  | T1 vs T2 = 0.705        |
|                                         |                   |                 |                |                  |                  | T1 vs T3 = 0.025        |
|                                         |                   |                 |                |                  |                  | T2 vs T3 = 0.046        |
| Fever - No (%)*                         |                   |                 |                |                  |                  |                         |
| 0                                       | 18 (100)          | 16 (89)         | 12 (86)        | 16 (100)         | 0.194            | T0 vs T1 = 0.180        |
| 1                                       | 0 (0)             | 1 (6)           | 0 (0)          | 0 (0)            |                  | T0 vs T2 = 0.157        |
| 2                                       | 0 (0)             | 0 (0)           | 2 (14)         | 0 (0)            |                  | T0 vs T3 = 1.000        |
| 3                                       | 0 (0)             | 0 (0)           | 0 (0)          | 0 (0)            |                  | T1 vs T2 = 0.785        |
| 4                                       | 0 (0)             | 1 (6)           | 0 (0)          | 0 (0)            |                  | T1 vs T3 = 0.180        |
|                                         |                   |                 |                |                  |                  | T2 vs T3 = 0.157        |
| Peripheral sensory neuropathy - No (%)* |                   |                 |                |                  |                  |                         |
| 0                                       | 18 (100)          | 15 (83)         | 2 (14)         | 3 (19)           | <b>&lt;0.001</b> | T0 vs T1 = 0.102        |
| 1                                       | 0 (0)             | 2 (11)          | 9 (64)         | 10 (63)          |                  | <b>T0 vs T2 = 0.001</b> |
| 2                                       | 0 (0)             | 1 (6)           | 3 (21)         | 3 (19)           |                  | <b>T0 vs T3 = 0.001</b> |
| 3                                       | 0 (0)             | 0 (0)           | 0 (0)          | 0 (0)            |                  | T1 vs T2 = 0.013        |
|                                         |                   |                 |                |                  |                  | <b>T1 vs T3 = 0.009</b> |
|                                         |                   |                 |                |                  |                  | T2 vs T3 = 0.655        |
| Hand foot syndrome - No. (%)*           |                   |                 |                |                  |                  |                         |
| 0                                       | 18 (100)          | 14 (78)         | 8 (57)         | 11 (69)          | <b>0.014</b>     | T0 vs T1 = 0.046        |
| 1                                       | 0 (0)             | 4 (22)          | 3 (21)         | 3 (19)           |                  | T0 vs T2 = 0.024        |
| 2                                       | 0 (0)             | 0 (0)           | 3 (21)         | 1 (6)            |                  | T0 vs T3 = 0.039        |
|                                         |                   |                 |                |                  |                  | T1 vs T2 = 0.063        |
|                                         |                   |                 |                |                  |                  | T1 vs T3 = 0.336        |



|                    |          |         |        |         |                  |                            |
|--------------------|----------|---------|--------|---------|------------------|----------------------------|
| 3                  | 0 (0)    | 0 (0)   | 0 (0)  | 1 (6)   |                  | T2 vs T3 = 0.157           |
| Fatigue - No (%)*  |          |         |        |         |                  | <b>T0 vs T1 &lt; 0.001</b> |
| 0                  | 14 (78)  | 0 (0)   | 0 (0)  | 2 (13)  | <b>&lt;0.001</b> | <b>T0 vs T2 = 0.001</b>    |
| 1                  | 4 (22)   | 12 (67) | 8 (57) | 11 (69) |                  | <b>T0 vs T3 = 0.002</b>    |
| 2                  | 0 (0)    | 6 (33)  | 6 (43) | 3 (19)  |                  | T1 vs T2 = 0.317           |
| 3                  | 0 (0)    | 0 (0)   | 0 (0)  | 0 (0)   |                  | T1 vs T3 = 0.102           |
|                    |          |         |        |         |                  | T2 vs T3 = 0.034           |
| Alopecia - No (%)* |          |         |        |         |                  | <b>T0 vs T1 &lt; 0.001</b> |
| 0                  | 18 (100) | 2 (11)  | 0 (0)  | 7 (44)  | <b>&lt;0.001</b> | <b>T0 vs T2 = 0.001</b>    |
| 1                  | 0 (0)    | 5 (28)  | 5 (36) | 2 (13)  |                  | T0 vs T3 = 0.005           |
| 2                  | 0 (0)    | 11 (61) | 9 (64) | 7 (44)  |                  | T1 vs T2 = 0.705           |
|                    |          |         |        |         |                  | T1 vs T3 = 0.132           |
|                    |          |         |        |         |                  | T2 vs T3 = 0.034           |

\* Percentages do not add up to 100% due to rounding

Wilcoxon signed-rank sum test with Bonferroni correction was used for pairwise comparison. After Bonferroni correction *p*-values below 0.0125 indicated significance.

| <b>Supplementary Table 16: Longitudinal clinical data - therapy adjustments of neoadjuvant treated patients (n=18)</b> |                         |                        |                       |
|------------------------------------------------------------------------------------------------------------------------|-------------------------|------------------------|-----------------------|
| <b>Therapy adjustments</b>                                                                                             | <b>T1<br/>during AC</b> | <b>T2<br/>during D</b> | <b>T3<br/>overall</b> |
| Therapy adjustments overall - No (%)                                                                                   |                         |                        |                       |
| No                                                                                                                     | 14 (78)                 | 11 (61)                | 8 (44)                |
| Yes                                                                                                                    | 4 (22)                  | 7 (39)                 | 10 (56)               |
| Type therapy adjustments overall - No (%)                                                                              |                         |                        |                       |
| Stop                                                                                                                   | 0 (0)                   | 4 (22)                 | 4 (22)                |
| Reduction, delay, and/or switch                                                                                        | 4 (22)                  | 3 (17)                 | 6 (33)                |
| % dose received overall                                                                                                |                         |                        |                       |
| Median (IQR)                                                                                                           | 100 (0)                 | 100 (20)               | 100 (10)              |
| 25%-75%                                                                                                                | 100-100                 | 80-100                 | 90-100                |

| <b>Supplementary Table 17: Response to AC-D of the neoadjuvant treated patients</b> |              |          |
|-------------------------------------------------------------------------------------|--------------|----------|
| <b>Response to AC-D</b>                                                             | <b>Total</b> | <b>N</b> |
| After AC-D response tumour pathology category - No. (%)                             |              |          |
| <i>Complete pathologic response</i>                                                 | 1 (6)        | 17       |
| <i>EUSOMA 2 (i)</i>                                                                 | 6 (35)       |          |
| <i>EUSOMA 2 (ii)</i>                                                                | 4 (24)       |          |
| <i>EUSOMA 2 (iii)</i>                                                               | 6 (35)       |          |
| After AC-D pathologic response*                                                     |              |          |
| <i>Low responders</i>                                                               | 10 (59)      | 17       |
| <i>High responders</i>                                                              | 7 (41)       |          |

\* High-responders (<10% remaining tumour cells) were defined as EUSOMA 1 and EUSOMA 2 (i). Low-responders (≥10 remaining tumour cells) were defined as EUSOMA 2 (ii), EUSOMA 2 (iii), and EUSOMA 3.

| <b>Supplementary Table 18: Clinical characteristics of the neoadjuvant study population at baseline. Response measured after AC-D according to EUSOMA</b> |                       |                                |                                |                |
|-----------------------------------------------------------------------------------------------------------------------------------------------------------|-----------------------|--------------------------------|--------------------------------|----------------|
| <b>Baseline characteristics</b>                                                                                                                           | <b>Total<br/>n=18</b> | <b>High responders<br/>n=7</b> | <b>Low responders<br/>n=10</b> | <b>p-value</b> |
| Age - Years                                                                                                                                               |                       |                                |                                |                |
| Mean (SD)                                                                                                                                                 | 58 (5)                | 60 (5)                         | 57 (5)                         | 0.199          |
| Range                                                                                                                                                     | 49-71                 | 55-71                          | 49-65                          |                |
| BMI - kg/m <sup>2</sup>                                                                                                                                   |                       |                                |                                |                |
| Mean (SD)                                                                                                                                                 | 28 (6)                | 27 (4)                         | 29 (6)                         | 0.429          |
| Range                                                                                                                                                     | 20-42                 | 23-33                          | 23-42                          |                |
| Weight loss past 3-6 months - in kg                                                                                                                       |                       |                                |                                |                |
| <5%                                                                                                                                                       | 16 (89)               | 6 (86)                         | 10 (100)                       | -              |
| 5%-10%                                                                                                                                                    | 2 (11)                | 1 (14)                         | 0 (0)                          |                |
| Focality - No. (%)*                                                                                                                                       |                       |                                |                                |                |
| Unifocal tumour                                                                                                                                           | 14 (78)               | 6 (86)                         | 8 (80)                         | 1.000          |
| Multifocal tumour                                                                                                                                         | 3 (17)                | 1 (14)                         | 2 (20)                         |                |
| Unknown                                                                                                                                                   | 1 (6)                 | 0 (0)                          | 0 (0)                          |                |
| cT stage - No. (%)*                                                                                                                                       |                       |                                |                                |                |
| 1                                                                                                                                                         | 3 (17)                | 2 (29)                         | 1 (10)                         | 0.325          |
| 2                                                                                                                                                         | 10 (56)               | 2 (29)                         | 8 (80)                         |                |
| 3                                                                                                                                                         | 2 (11)                | 1 (14)                         | 1 (10)                         |                |
| 4                                                                                                                                                         | 2 (11)                | 2 (29)                         | 0 (0)                          |                |
| Unknown                                                                                                                                                   | 1 (6)                 | 0 (0)                          | 0 (0)                          |                |
| cG grade - No. (%)*                                                                                                                                       |                       |                                |                                |                |
| 1                                                                                                                                                         | 2 (11)                | 1 (14)                         | 1 (10)                         | 0.621          |
| 2                                                                                                                                                         | 12 (67)               | 4 (57)                         | 7 (70)                         |                |
| 3                                                                                                                                                         | 3 (17)                | 2 (29)                         | 1 (10)                         |                |
| Unknown                                                                                                                                                   | 1 (6)                 | 0 (0)                          | 1 (0)                          |                |
| cN stage - No. (%)*                                                                                                                                       |                       |                                |                                |                |
| 0                                                                                                                                                         | 11 (61)               | 4 (57)                         | 7 (70)                         | 0.665          |
| 1                                                                                                                                                         | 4 (22)                | 2 (29)                         | 2 (20)                         |                |
| 2                                                                                                                                                         | 1 (6)                 | 0 (0)                          | 0 (0)                          |                |
| 3                                                                                                                                                         | 2 (11)                | 1 (14)                         | 1 (10)                         |                |
| cT size - in mm                                                                                                                                           |                       |                                |                                |                |
| Median (IQR)                                                                                                                                              | 28 (16)               | 24 (20)                        | 29 (16)                        | 0.812          |
| 25%-75%                                                                                                                                                   | 22-38                 | 20-40                          | 22-38                          |                |
| MIB1%                                                                                                                                                     |                       |                                |                                |                |
| Median (IQR)                                                                                                                                              | 10 (24)               | 50 (-)                         | 10 (17)                        | 0.190          |
| 25%-75%                                                                                                                                                   | 5-29                  | 25- -                          | 4-20                           |                |
| Ki-67%                                                                                                                                                    |                       |                                |                                |                |
| Median (IQR)                                                                                                                                              | 25 (25)               | 50 (-)                         | 10 (24)                        | 0.190          |
| 25%-75%                                                                                                                                                   | 5-30                  | 25- -                          | 4-28                           |                |

|                                                    |          |         |          |       |
|----------------------------------------------------|----------|---------|----------|-------|
| Tumour-type - No (%)                               |          |         |          |       |
| <i>Invasive carcinoma of no special type (NST)</i> | 16 (89)  | 7 (100) | 8 (80)   |       |
| <i>Lobular</i>                                     | 2 (11)   | 0 (0)   | 2 (20)   | 0.485 |
| <i>Mucinous</i>                                    | 0 (0)    | 0 (0)   | 0 (0)    |       |
| <i>Unknown</i>                                     | 0 (0)    | 0 (0)   | 0 (0)    |       |
| ER- No (%)                                         |          |         |          |       |
| <i>Negative</i>                                    | 0 (0)    | 0 (0)   | 0 (0)    | -     |
| <i>Positive</i>                                    | 18 (100) | 7 (100) | 10 (100) |       |
| ER %                                               |          |         |          |       |
| <i>Median (IQR)</i>                                | 100 (5)  | 100 (5) | 100 (6)  | 0.962 |
| <i>25%-75%</i>                                     | 95-100   | 95-100  | 94-100   |       |
| PR- No (%)*                                        |          |         |          |       |
| <i>Negative</i>                                    | 9 (50)   | 4 (57)  | 4 (40)   | 0.637 |
| <i>Positive</i>                                    | 9 (50)   | 3 (43)  | 6 (60)   |       |
| PR %                                               |          |         |          |       |
| <i>Median (IQR)</i>                                | 12 (91)  | 8 (80)  | 33 (95)  | 0.417 |
| <i>25%-75%</i>                                     | 0-92     | 0-80    | 1-96     |       |
| Radiotherapy received any time - No. (%)*          |          |         |          |       |
| <i>No</i>                                          | 3 (17)   | 2 (29)  | 1 (10)   | 0.537 |
| <i>Yes</i>                                         | 15 (83)  | 5 (71)  | 9 (90)   |       |
| Karnofsky Performance Score - No (%)*              |          |         |          |       |
| <i>80-90</i>                                       | 5 (28)   | 2 (28)  | 3 (30)   | 0.935 |
| <i>100</i>                                         | 13 (72)  | 5 (71)  | 7 (70)   |       |
| MUST-score - No (%)                                |          |         |          |       |
| <i>Low risk</i>                                    | 16 (89)  | 6 (86)  | 10 (100) | 0.232 |
| <i>Medium risk</i>                                 | 2 (11)   | 1 (14)  | 0 (0)    |       |
| <i>High risk</i>                                   | 0 (0)    | 0 (0)   | 0 (0)    |       |
| DM-type II - No. (%)*                              |          |         |          |       |
| <i>No</i>                                          | 16 (89)  | 6 (86)  | 9 (90)   | 1.000 |
| <i>Yes</i>                                         | 2 (11)   | 1 (14)  | 1 (10)   |       |
| Prior systemic treatment - No. (%)                 |          |         |          |       |
| <i>No</i>                                          | 18 (100) | 7 (100) | 10 (100) | -     |
| <i>Yes</i>                                         | 0 (0)    | 0 (0)   | 0 (0)    |       |
| Therapeutic antibiotic use last year - No. (%)*    |          |         |          |       |
| <i>No</i>                                          | 14 (78)  | 6 (86)  | 8 (80)   | 1.000 |
| <i>Yes</i>                                         | 4 (22)   | 1 (14)  | 2 (20)   |       |
| Days therapeutic antibiotic use last year          |          |         |          |       |
| <i>Median (IQR)</i>                                | 9 (-)    | -       | 9 (-)    | -     |
| <i>25%-75%</i>                                     | 7- -     |         | 7- -     |       |

\*Percentages do not add up to 100% due to rounding.

**Supplementary Table 19:** Clinical characteristics after neoadjuvant chemotherapy. Response measured after AC-D according to EUSOMA

| Clinical characteristics | Total<br>n=18 | High responders<br>n=7 | Low responders<br>n=10 | p-value |
|--------------------------|---------------|------------------------|------------------------|---------|
| OK-type - No (%)*        |               |                        |                        |         |
| <i>Lumpectomy</i>        | 8 (44)        | 3 (43)                 | 5 (50)                 | 1.000   |
| <i>Mastectomy</i>        | 9 (50)        | 4 (57)                 | 5 (50)                 |         |
| <i>Unknown</i>           | 1 (6)         | 0 (0)                  | 0 (0)                  |         |
| pG grade - No. (%)*      |               |                        |                        |         |
| 1                        | 4 (22)        | 1 (14)                 | 3 (30)                 | 0.251   |
| 2                        | 5 (28)        | 2 (29)                 | 3 (30)                 |         |
| 3                        | 1 (6)         | 1 (14)                 | 0 (0)                  |         |
| <i>Unknown</i>           | 8 (44)        | 3 (43)                 | 4 (40)                 |         |
| pN stage - No. (%)*      |               |                        |                        |         |
| 0                        | 9 (50)        | 4 (57)                 | 5 (50)                 | 0.690   |
| 1                        | 6 (33)        | 3 (43)                 | 3 (30)                 |         |
| 2                        | 2 (11)        | 0 (0)                  | 1 (10)                 |         |
| 3                        | 0 (0)         | 0 (0)                  | 0 (0)                  |         |
| <i>Unknown</i>           | 1 (6)         | 0 (0)                  | 1 (10)                 |         |
| pT size - in mm          |               |                        |                        |         |
| <i>Mean (SD)</i>         | 21 (14)       | 19 (15)                | 22 (13)                | 0.638   |
| <i>Range</i>             | 0-48          | 0-47                   | 6-48                   |         |
| pT stage - No. (%)*      |               |                        |                        |         |
| 0                        | 1 (6)         | 1 (14)                 | 0 (0)                  | 0.232   |
| 1                        | 9 (50)        | 4 (57)                 | 5 (50)                 |         |
| 2                        | 7 (39)        | 2 (29)                 | 5 (50)                 |         |
| 3                        | 0 (0)         | 0 (0)                  | 0 (0)                  |         |
| 4                        | 0 (0)         | 0 (0)                  | 0 (0)                  |         |
| <i>Unknown</i>           | 1 (6)         | 0 (0)                  | 0 (0)                  |         |
| T2 Tumour reduction in % |               |                        |                        |         |
| <i>Mean (SD)</i>         | 36 (29)       | 39 (39)                | 33 (21)                | 0.682   |
| <i>Range</i>             | -20-100       | -20-100                | -5-73                  |         |

\*Percentages do not add up to 100% due to rounding.

**Supplementary Table 20:**  $\alpha$ -diversity measures of the neoadjuvant study population. Response measured after AC-D according to EUSOMA

| $\alpha$ -diversity measures | Total<br><i>n</i> =18 | High<br>responders<br><i>n</i> =7 | Low responders<br><i>n</i> =10 | <i>p</i> -value |
|------------------------------|-----------------------|-----------------------------------|--------------------------------|-----------------|
| T0 Observed richness         |                       |                                   |                                |                 |
| Mean (SD)                    | 238 (52)              | 232 (70)                          | 242 (41)                       | 0.708           |
| Range                        | 136-330               | 136-330                           | 153-302                        |                 |
| T1 Observed richness         |                       |                                   |                                |                 |
| Mean (SD)                    | 233 (34)              | 232 (45)                          | 234 (29)                       | 0.907           |
| Range                        | 169-293               | 172-293                           | 169-266                        |                 |
| T2 Observed richness         |                       |                                   |                                |                 |
| Mean (SD)                    | 218 (48)              | 211 (31)                          | 225 (57)                       | 0.674           |
| Range                        | 136-294               | 175-239                           | 136-294                        |                 |
| T3 Observed richness         |                       |                                   |                                |                 |
| Mean (SD)                    | 218 (48)              | 212 (36)                          | 210 (48)                       | 0.931           |
| Range                        | 136-294               | 178-257                           | 126-260                        |                 |
| T0 Shannon index             |                       |                                   |                                |                 |
| Mean (SD)                    | 4.1 (0.4)             | 3.9 (0.6)                         | 4.2 (0.3)                      | 0.238           |
| Range                        | 3.0-4.6               | 3.0-4.6                           | 3.6-4.6                        |                 |
| T1 Shannon index             |                       |                                   |                                |                 |
| Mean (SD)                    | 4.0 (0.3)             | 4.0 (0.3)                         | 4.1 (0.3)                      | 0.669           |
| Range                        | 3.4-4.5               | 3.4-4.2                           | 3.6-4.5                        |                 |
| T2 Shannon index             |                       |                                   |                                |                 |
| Mean (SD)                    | 3.9 (0.3)             | 3.9 (0.2)                         | 3.9 (0.30)                     | 0.999           |
| Range                        | 3.5-4.4               | 3.7-4.2                           | 3.5-4.4                        |                 |
| T3 Shannon index             |                       |                                   |                                |                 |
| Median (IQR)                 | 3.9 (0.4)             | 3.8 (0.3)                         | 4.1 (0.5)                      | 0.456           |
| 25-75%                       | 3.7-4.1               | 3.7-4.0                           | 3.7-4.1                        |                 |

Differences in  $\alpha$ -diversity between high and low responders measured at T2 according to EUSOMA were analysed with an unpaired t-test.

High-responders (<10% remaining tumour cells) were defined as EUSOMA 1 and EUSOMA 2 (i). Low-responders ( $\geq$ 10 remaining tumour cells) were defined as EUSOMA 2 (ii), EUSOMA 2 (iii), and EUSOMA

**Supplementary Table 21:** Basic 16S rRNA gene sequencing statistics of the gut bacterial microbiota using the Illumina MiSeq instrument

| <b>Item</b>                       | <b>Data</b>                |
|-----------------------------------|----------------------------|
| Amplified region                  | 515F-806R                  |
| Primer sequence 515F              | 5'-GTGCCAGCMGCCGCGTAA-3'   |
| Primer sequence 806R              | 5'-GGACTACHVGGGTWTCTAAT-3' |
| Number of samples                 | 153                        |
| Total raw reads                   | 18.890.872                 |
| Mean reads per sample             | 123.470                    |
| Total sequences per sample        |                            |
| <i>Minimum</i>                    | 51.119                     |
| <i>Maximum</i>                    | 176.490                    |
| Mean %GC                          | 53                         |
| Sequence length                   | 251                        |
| Sequences flagged as poor quality | 0                          |
